# Supplementary material
Source: PubMed Central journal article supplement (PMC4643526)
Supplement: supp_dev229_dev229supp_fig1.pdf [file supp_dev229_dev229supp_fig1.pdf]

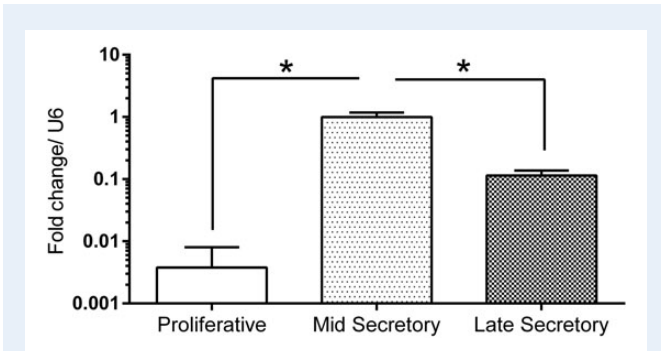

**Supplementary Figure S1** MicroRNA-451 expression during normal menstrual cycle of baboons ( $n = 3$ ). Mean values with SD are shown. (\* $P < 0.05$ ).
