# Supplementary material
Source: PubMed Central journal article supplement (PMC4643526)
Supplement: supp_dev229_dev229supp_fig2.pdf [file supp_dev229_dev229supp_fig2.pdf]

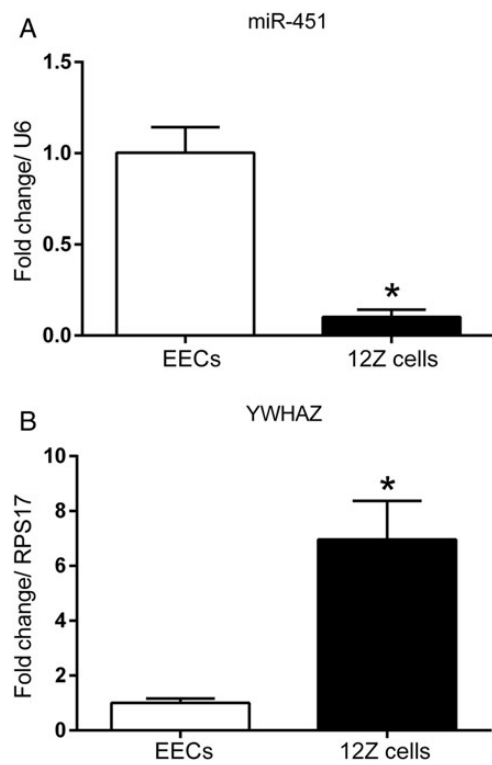

**Supplementary Figure S2** Endogenous expression of miR-451 (A) and YWHAZ (B) in endometrial epithelial cells and 12Z cells. Mean values with SD are shown. (\* $P < 0.05$ ).
