# Supplementary material
Source: PubMed Central journal article supplement (PMC4643526)
Supplement: supp_dev229_dev229supp_fig3.pdf [file supp_dev229_dev229supp_fig3.pdf]

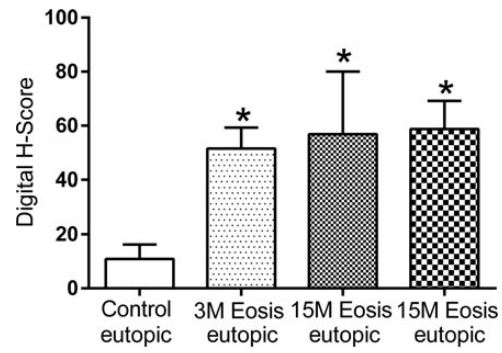

**Supplementary Figure S3** Results of Digital H-Score analysis performed using Image J software for YWHAZ protein immunohistochemistry data. Mean values with SD are shown. (\* $P < 0.05$ ).
