# Supplementary material
Source: PubMed Central journal article supplement (PMC4643526)
Supplement: supp_dev229_dev229supp_table1.pdf [file supp_dev229_dev229supp_table1.pdf]

**Supplementary Table S1 Subject details for the samples from women used for miR-451 quantitative RT-PCR.**

| Sample ID | Cycle day | Diagnosis                     |
|-----------|-----------|-------------------------------|
| N026      | 18        | No endometriosis              |
| N032      | 21        | No endometriosis              |
| G173A     | 23–24     | No endometriosis              |
| G212A     | 21–22     | No endometriosis              |
| G214A     | 23–24     | No endometriosis              |
| G360B     | 22        | No endometriosis              |
| G422A     | 21–22     | No endometriosis              |
| G299A     | 24–25     | Endometriosis Stage-III       |
| G369A     | 20–21     | Endometriosis Stage-I         |
| G373B     | 27        | Endometriosis Stage-moderate  |
| G387A     | 23–24     | Endometriosis Stage-severe    |
| G397A     | 20–21     | Endometriosis Stage-II        |
| G411A     | 24–25     | Endometriosis Stage-I         |
| G414B     | 21–22     | Endometriosis Stage-II        |
| G416A     | 22        | Endometriosis Stage-not known |
| G418A     | 21        | Endometriosis Stage-II        |
| G420A     | 24        | Endometriosis Stage-not known |
| G435A     | 21–22     | Endometriosis Stage-I         |
| G442A     | 23–24     | Endometriosis Stage-not known |
| G447B     | 23–24     | Endometriosis Stage-II        |
| G448B     | 19–20     | Endometriosis Stage-II        |
| M102C     | 21–22     | Endometriosis Stage-III       |
| R01C      | 22–23     | Endometriosis Stage-III       |
| R03C      | 20–21     | Endometriosis Stage-III       |
| R07C      | 23        | Endometriosis Stage-I         |
| R08C      | Secretory | Endometriosis Stage-mild      |
